# Supplementary material
Source: PubMed Central journal article supplement (PMC441375)
Supplement: 1471-2164-5-33-S2.pdf [file 1471-2164-5-33-S2.pdf]

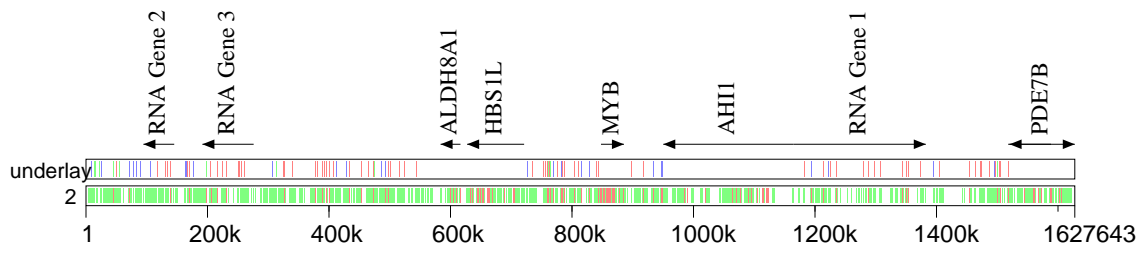

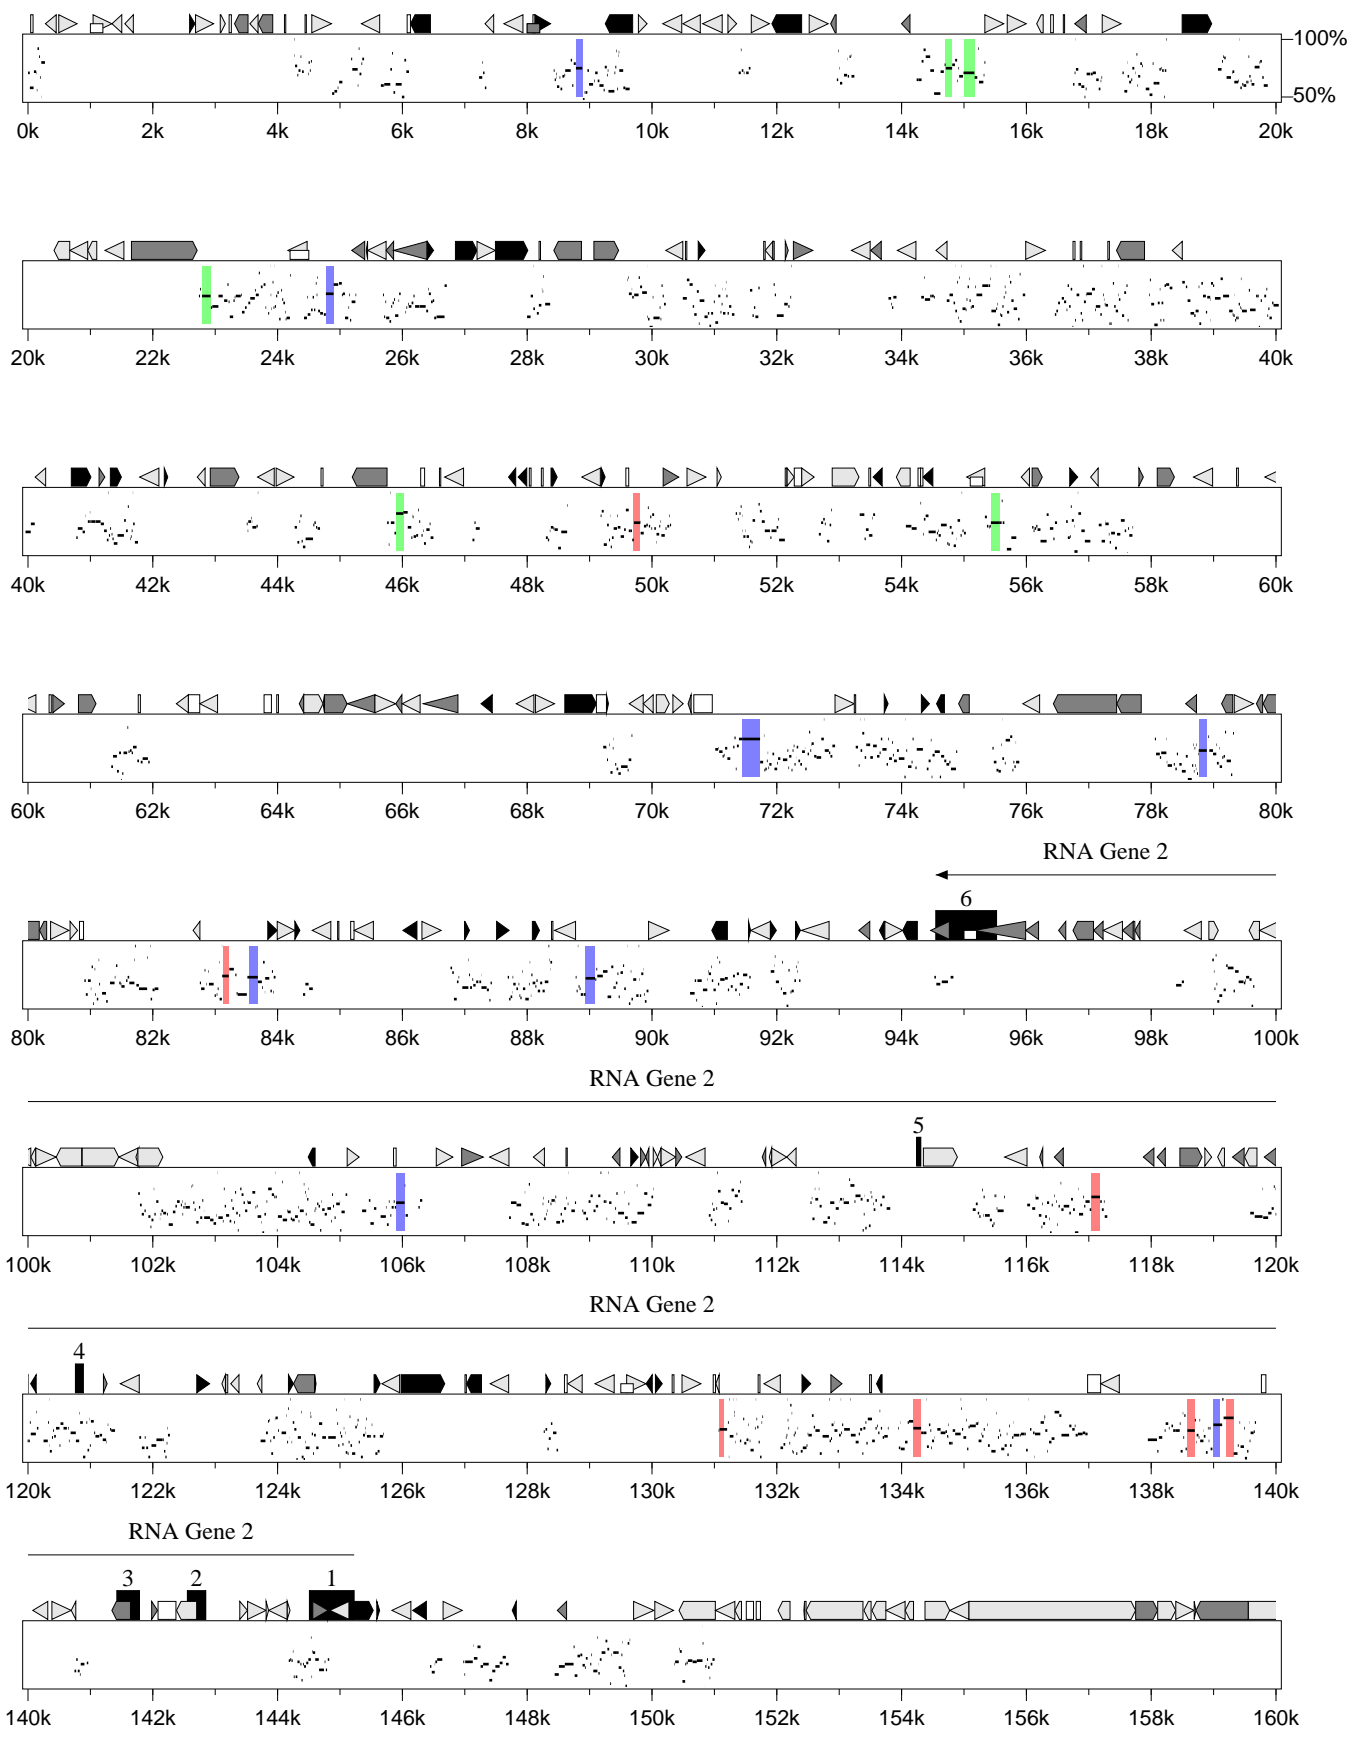

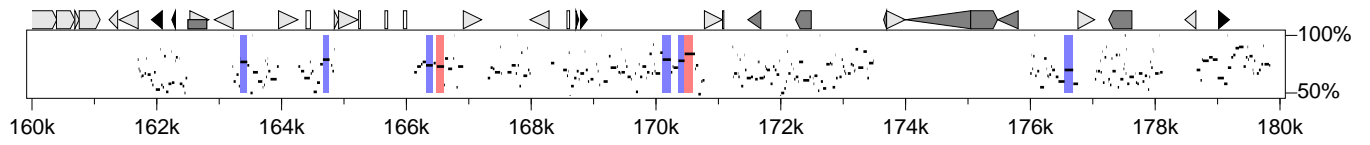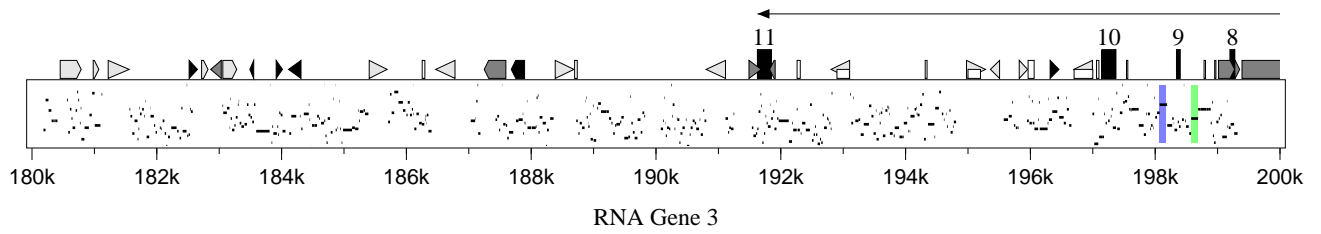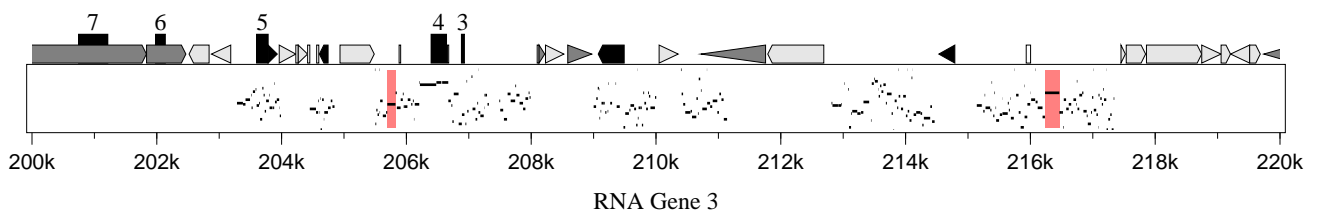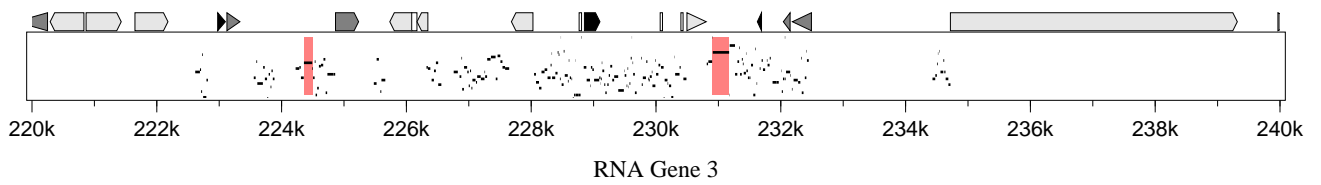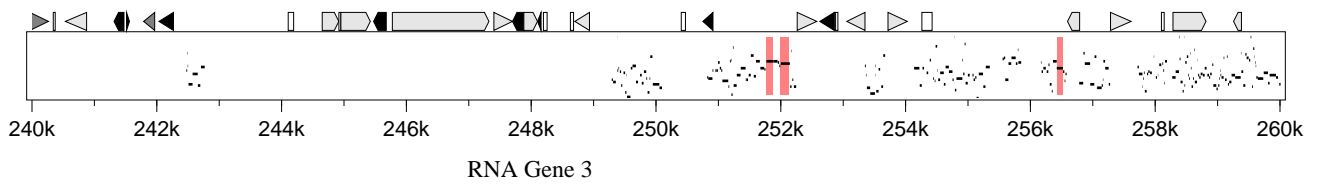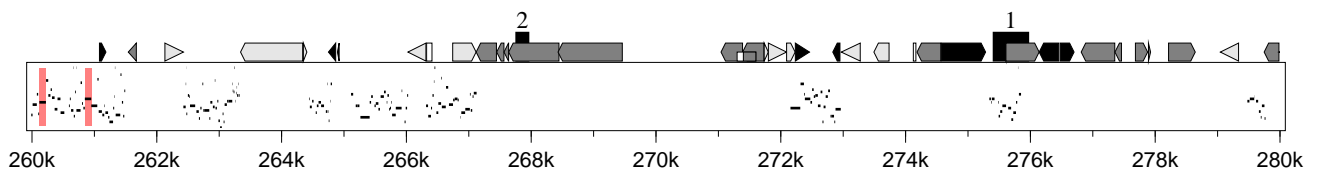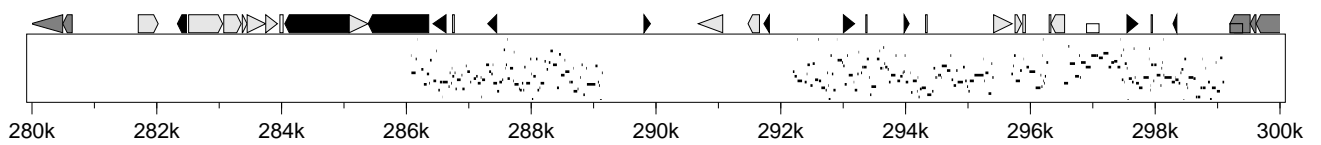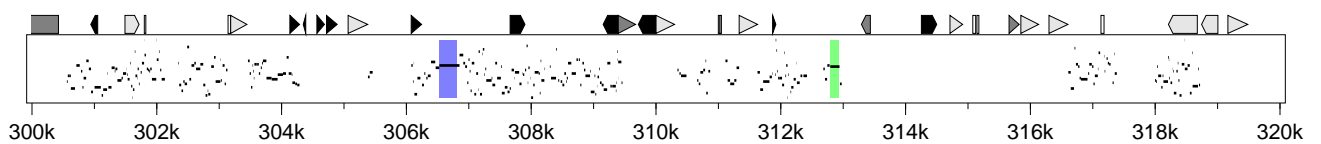

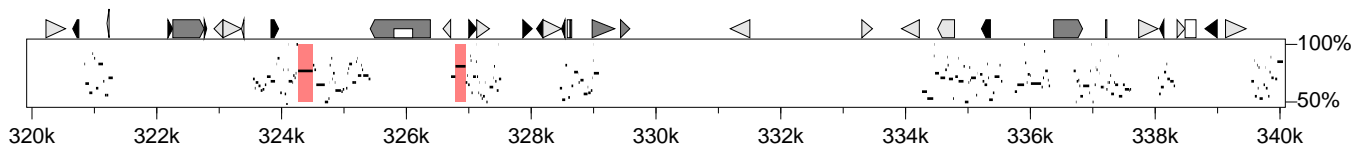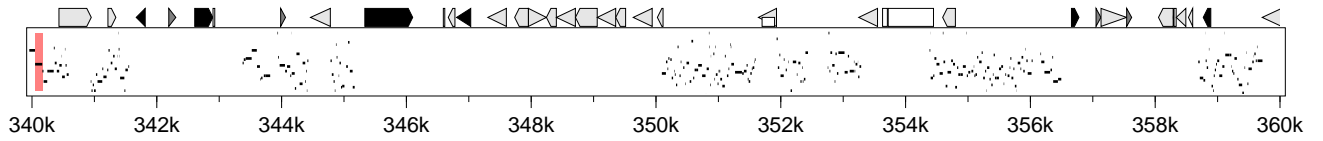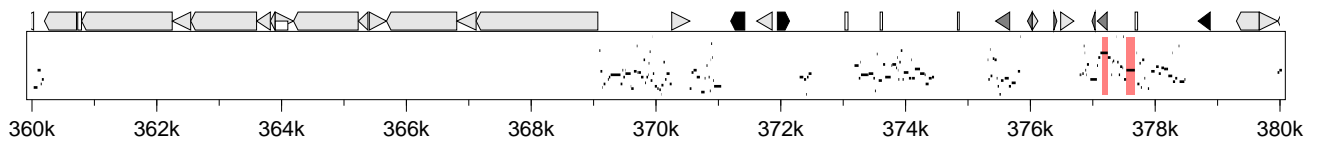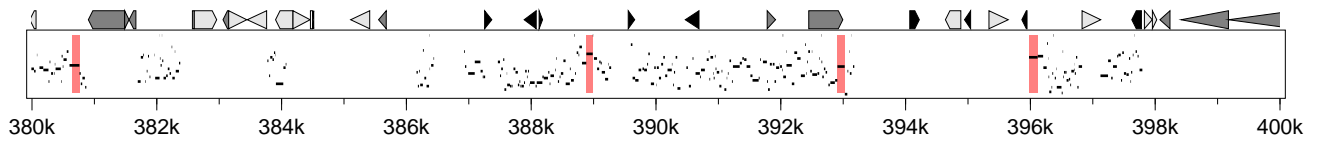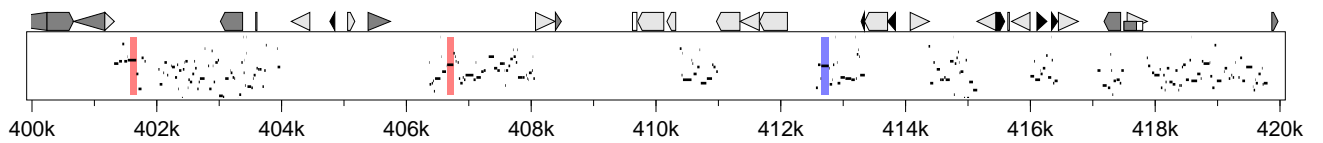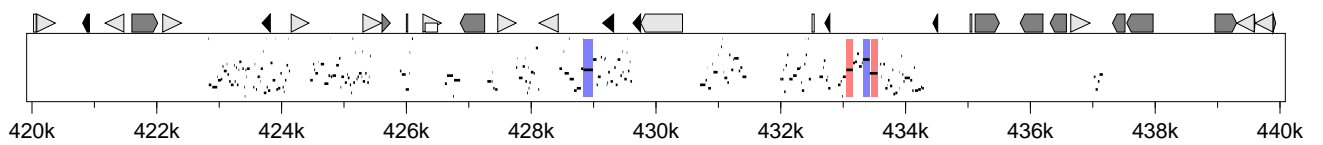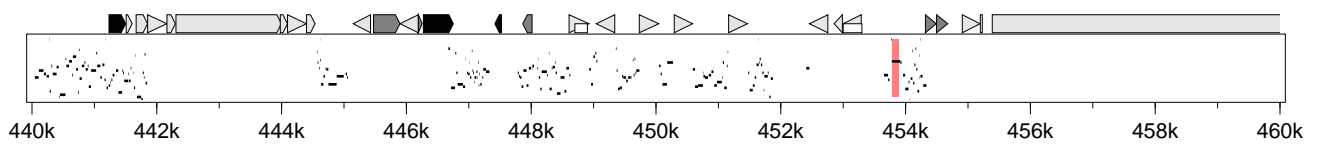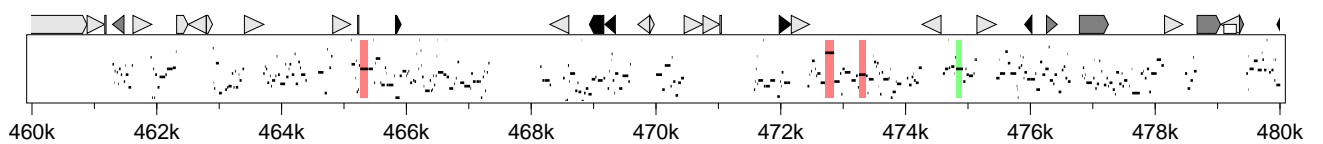

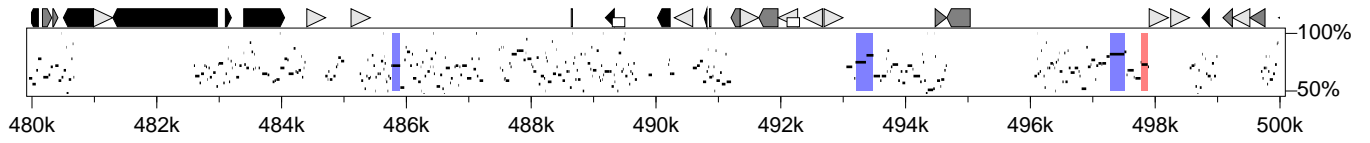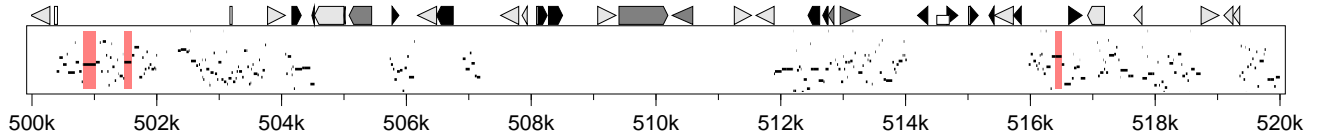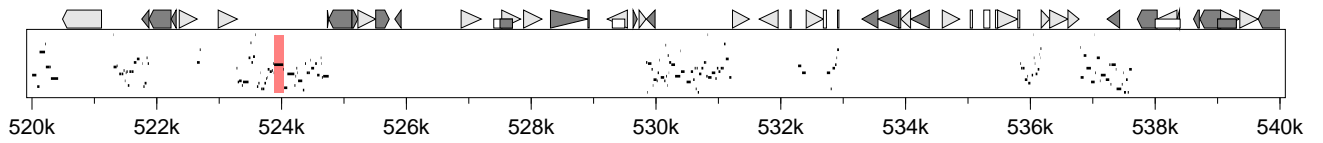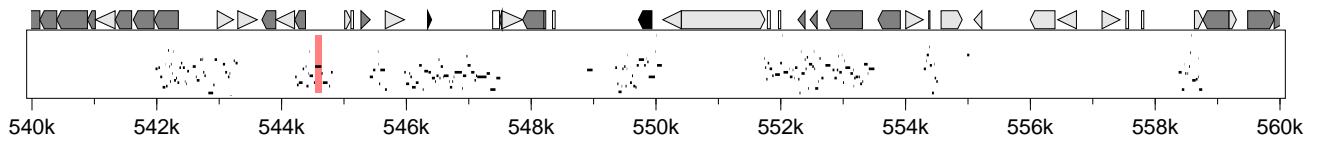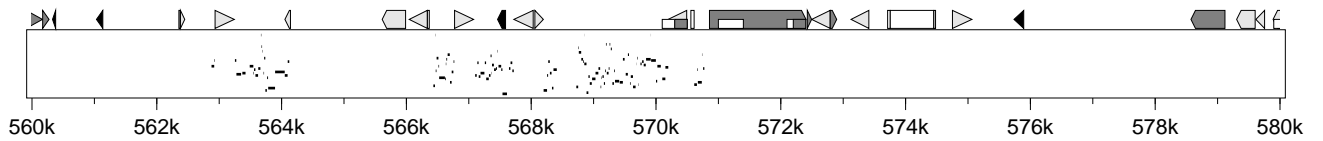

ALDH8A1

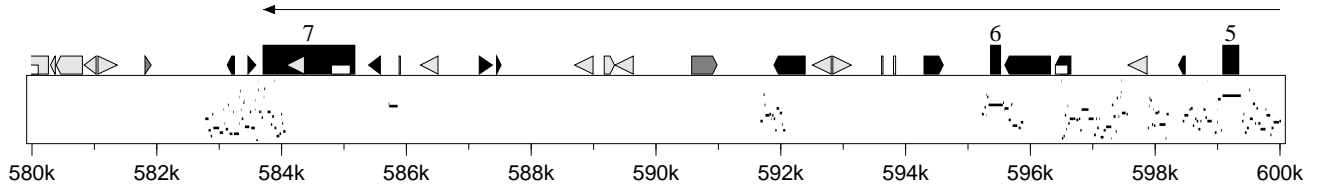

ALDH8A1

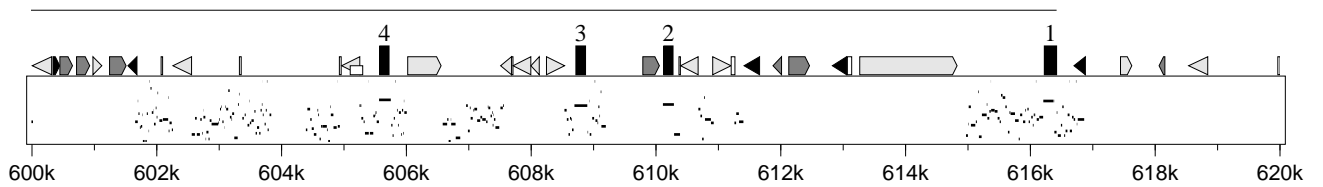

HBS1L

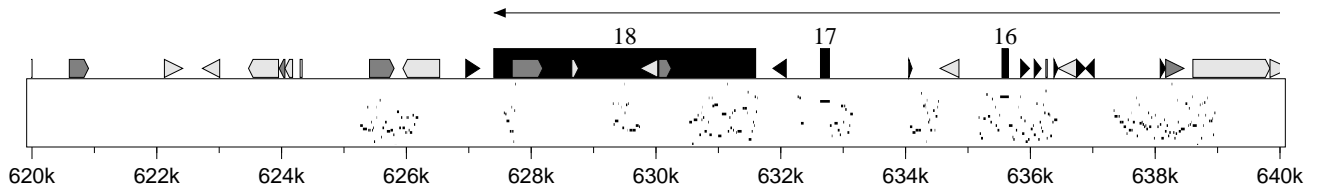

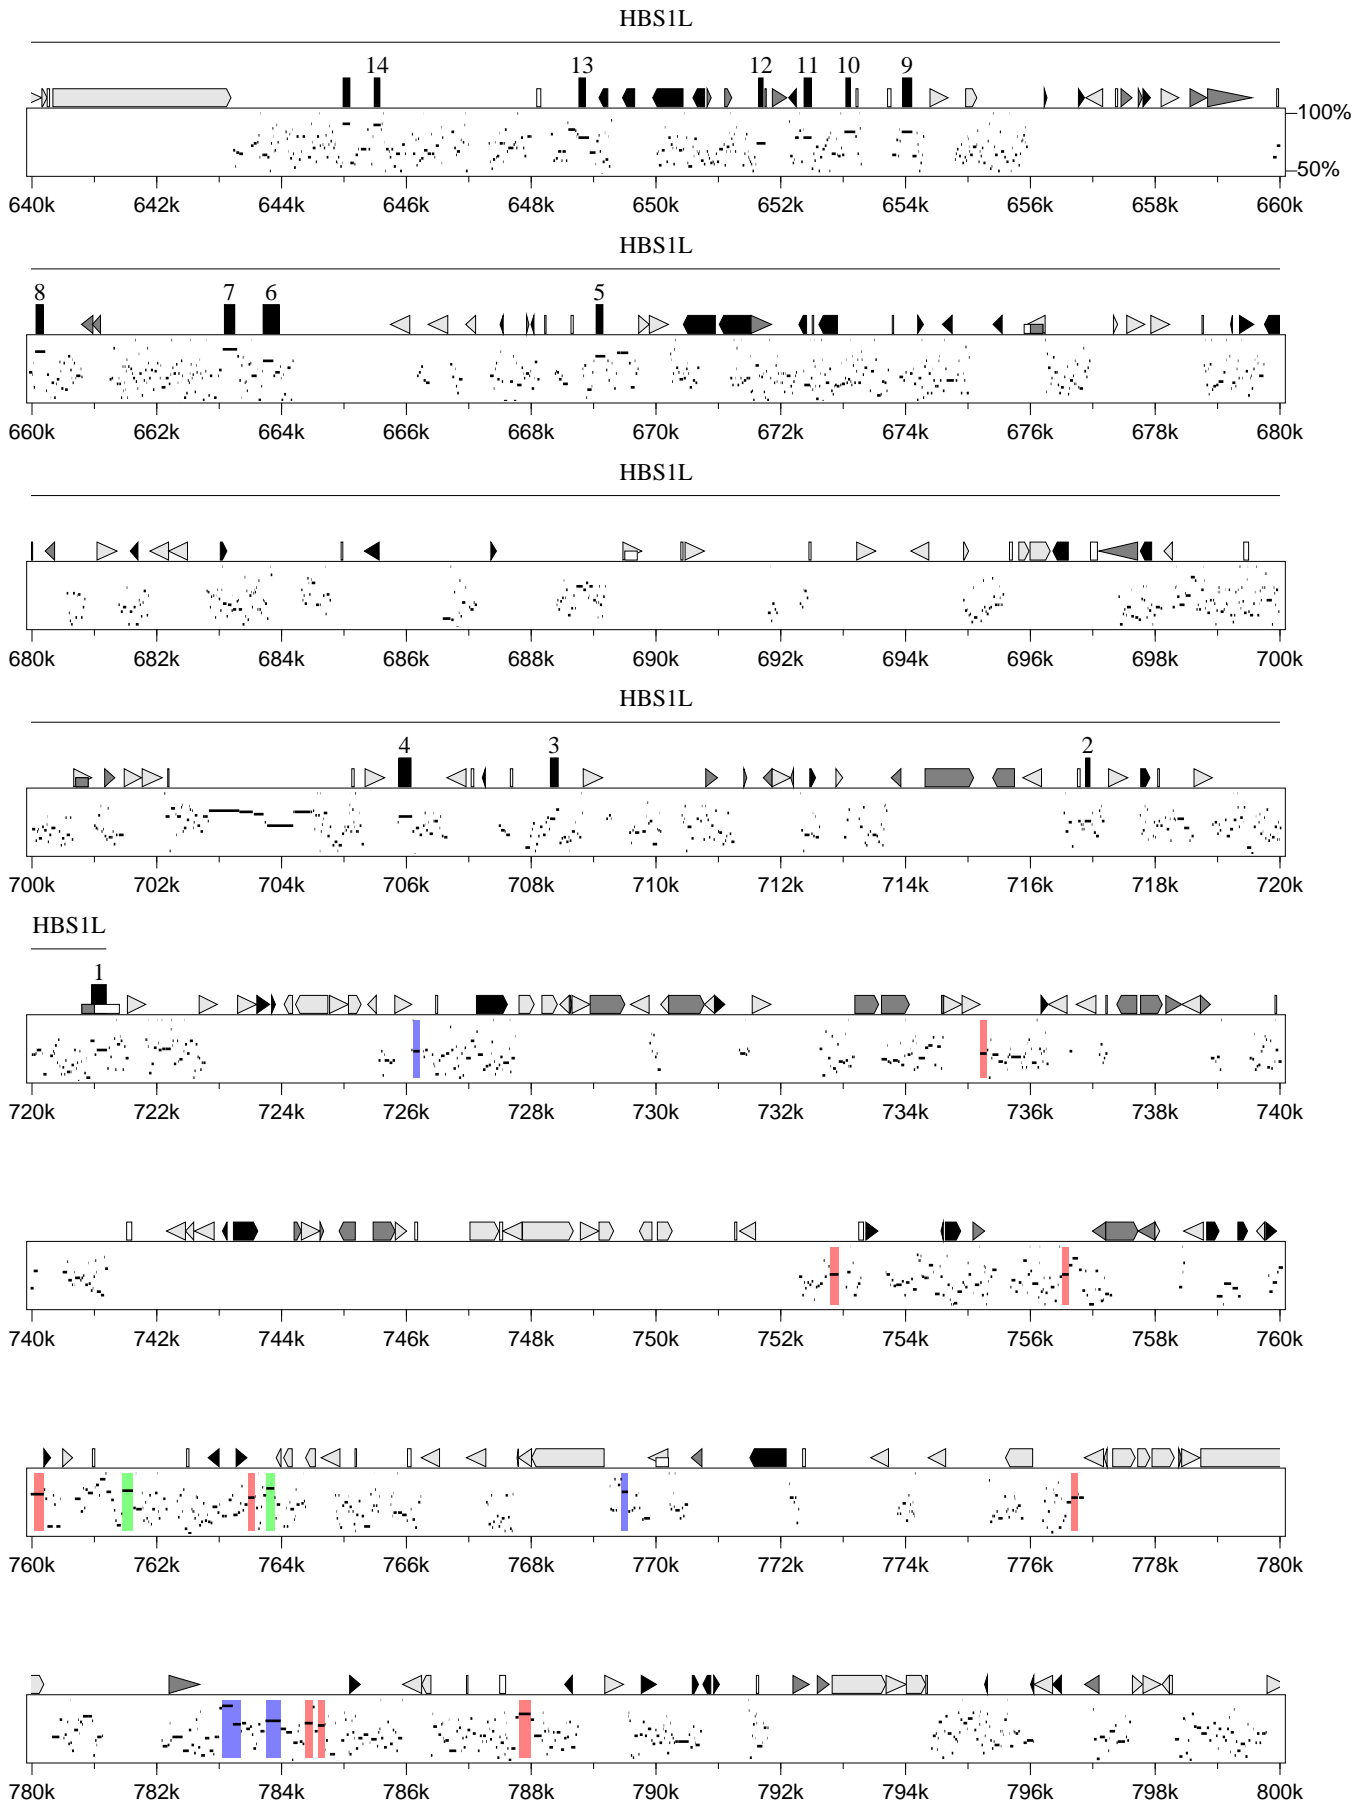

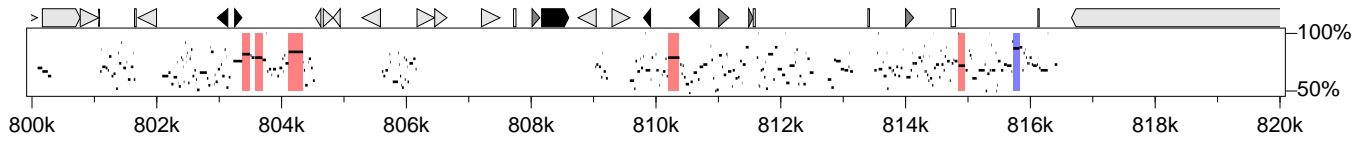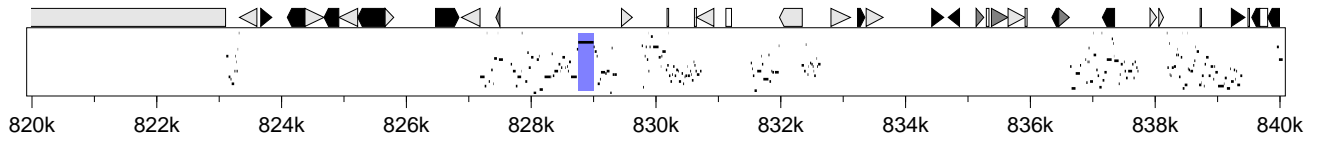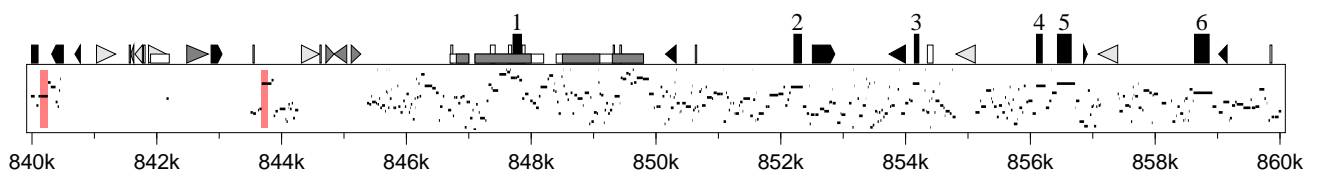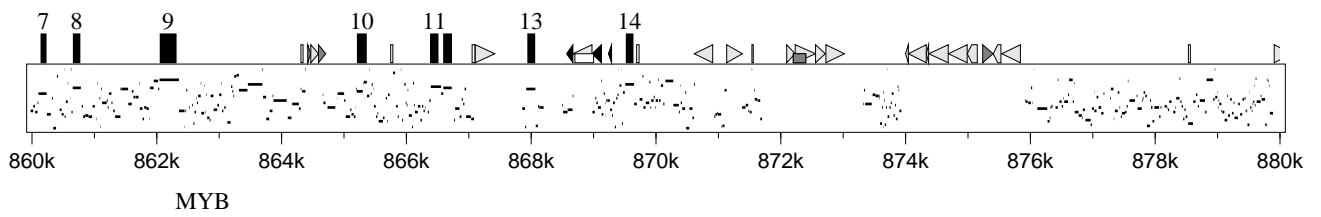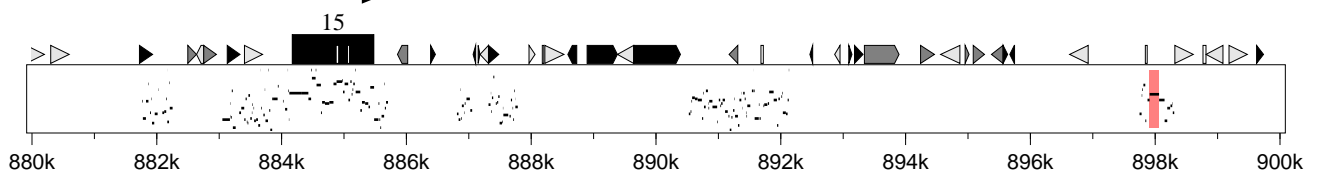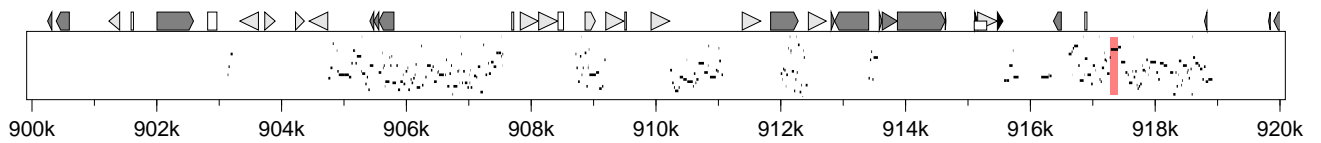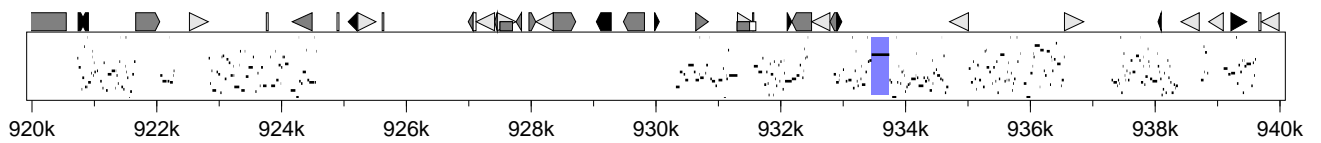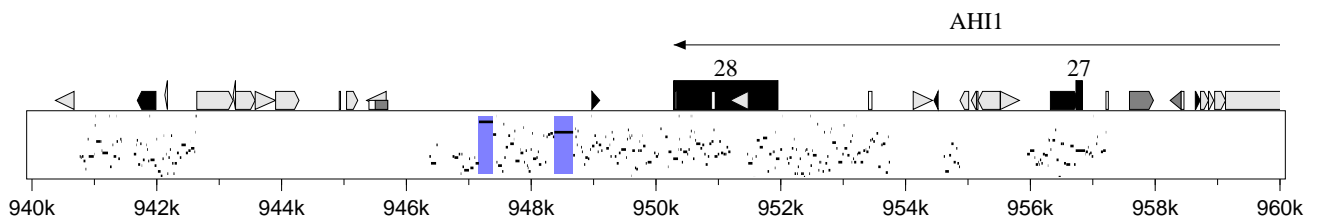

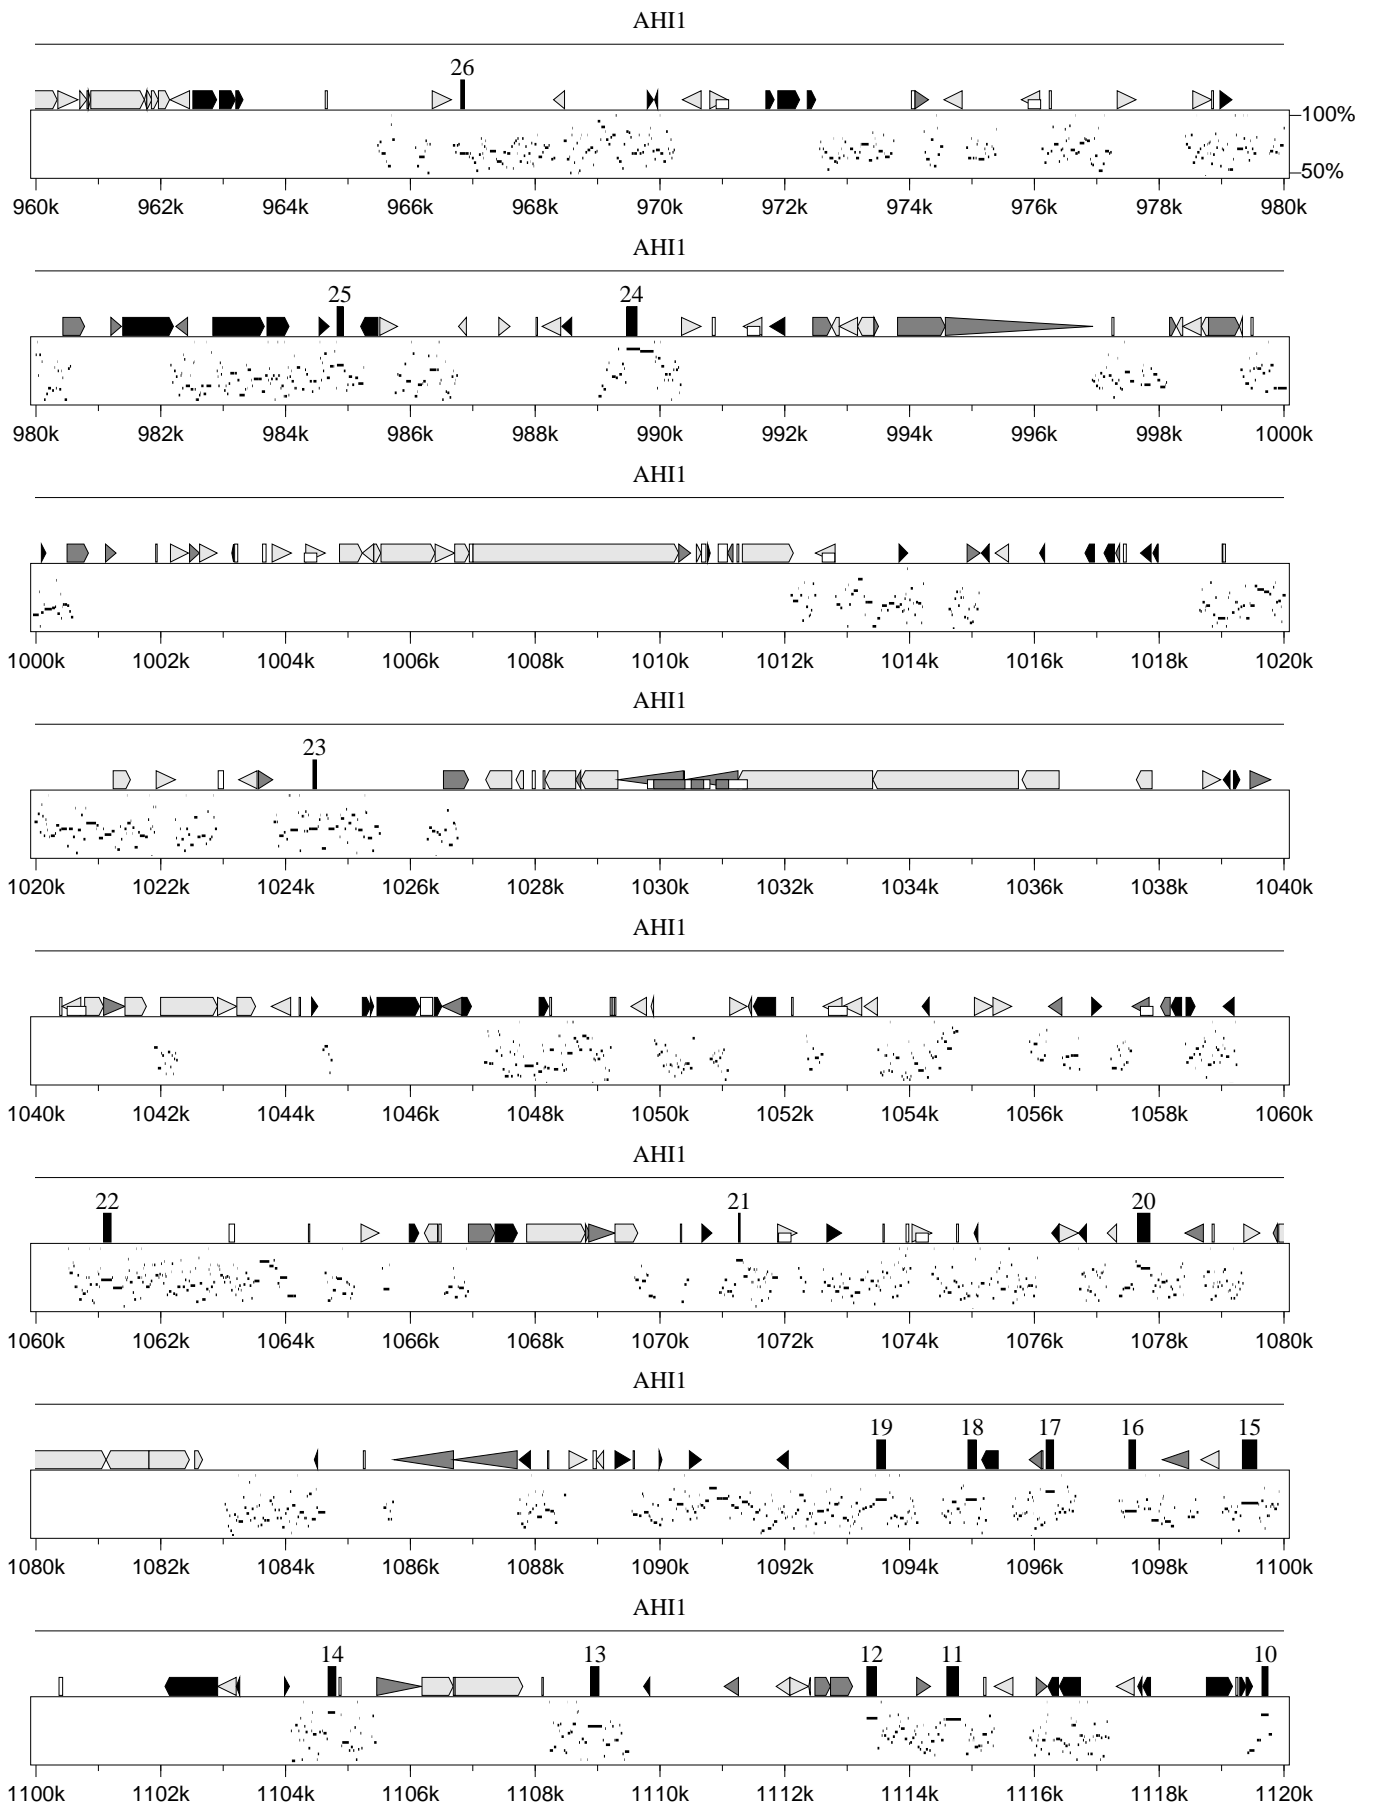



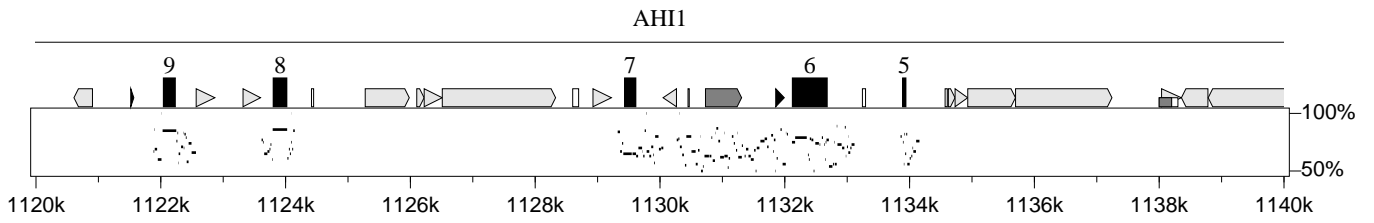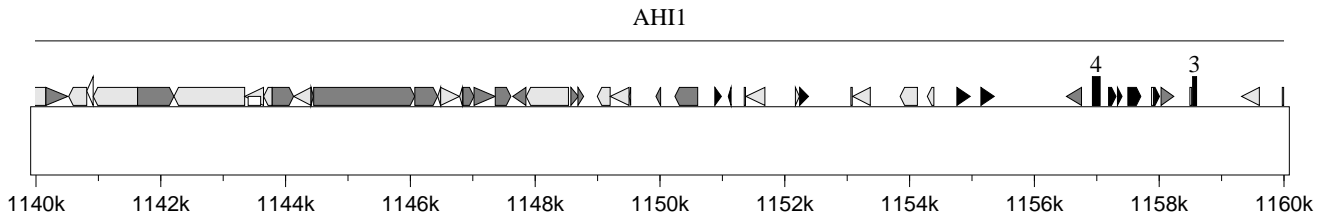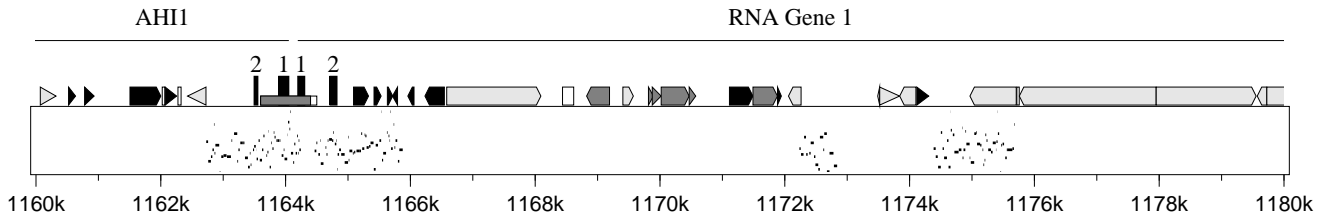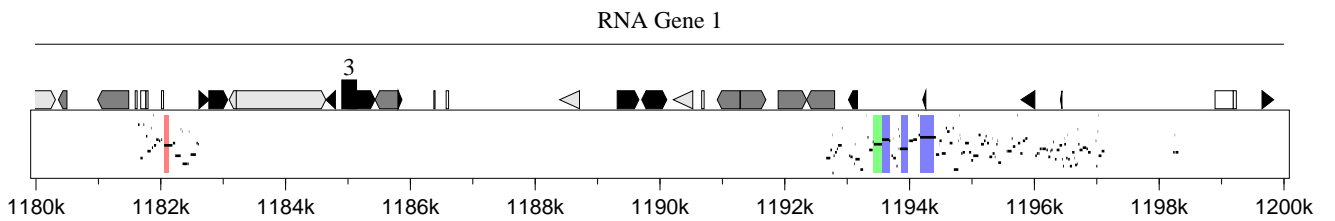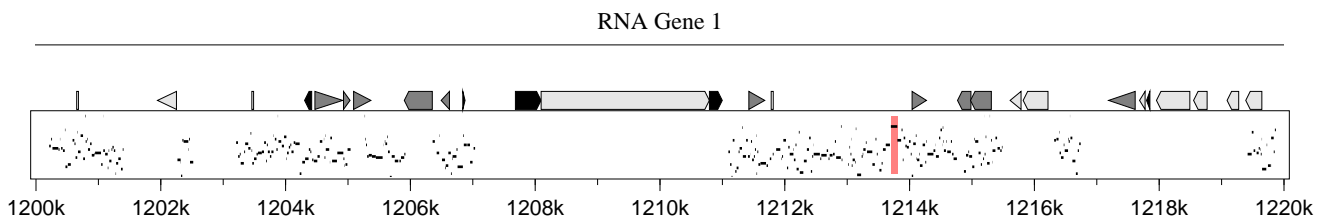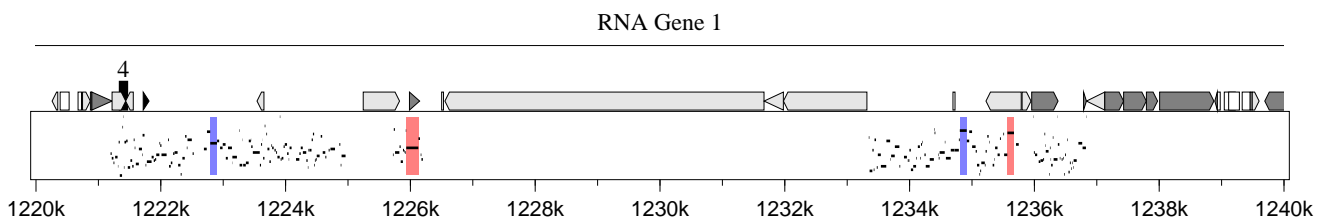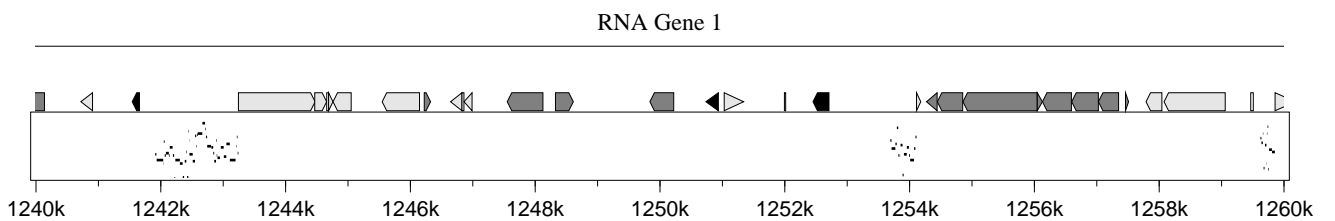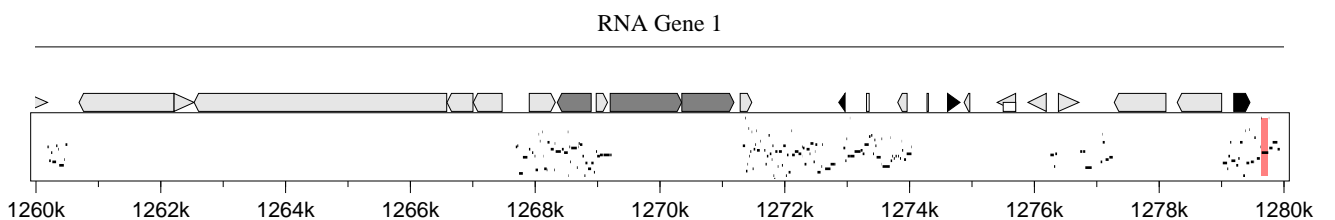

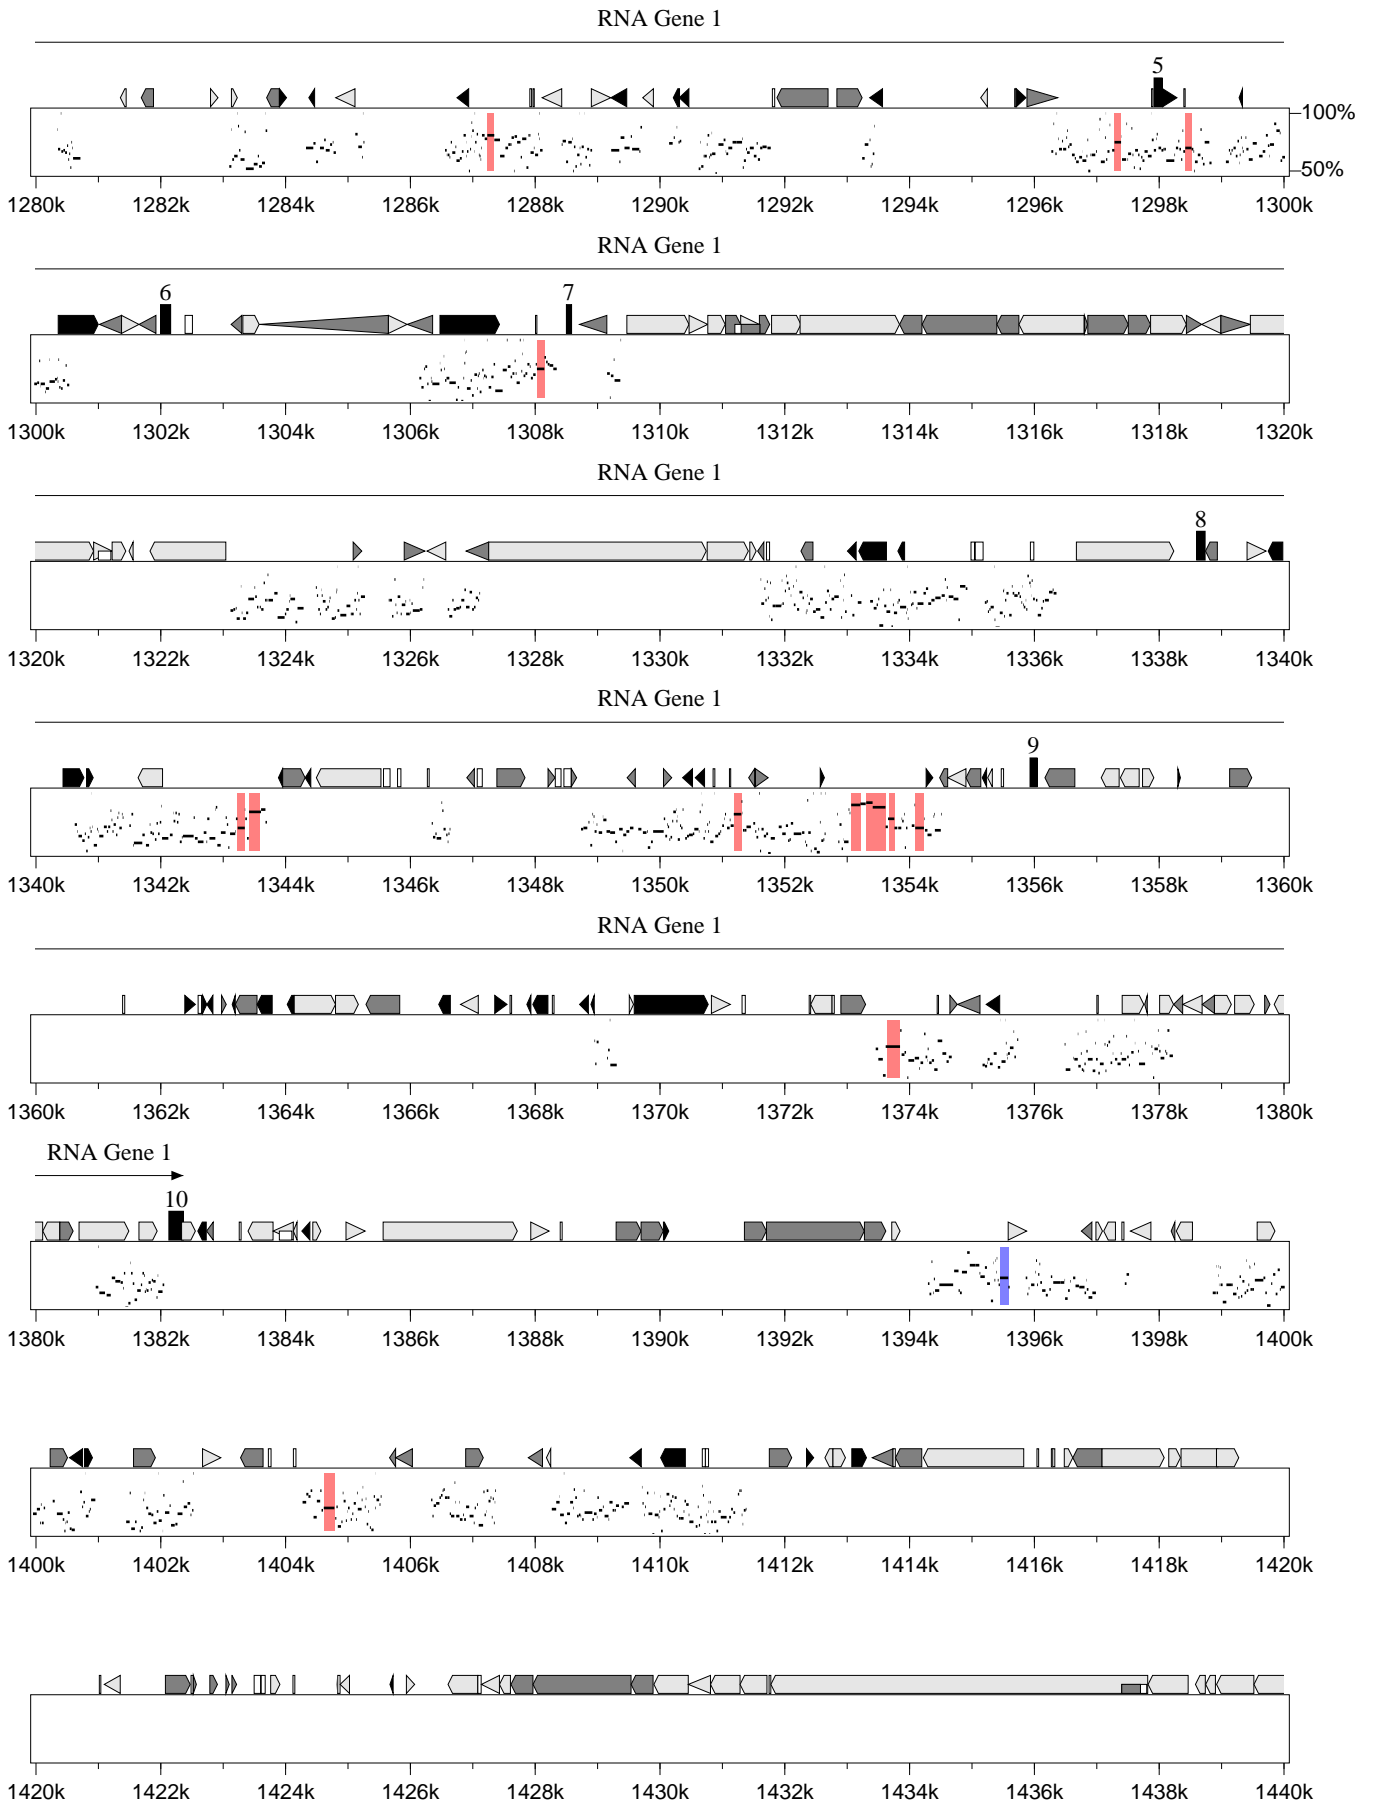

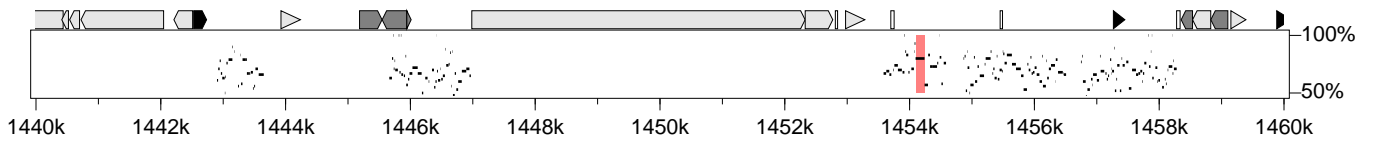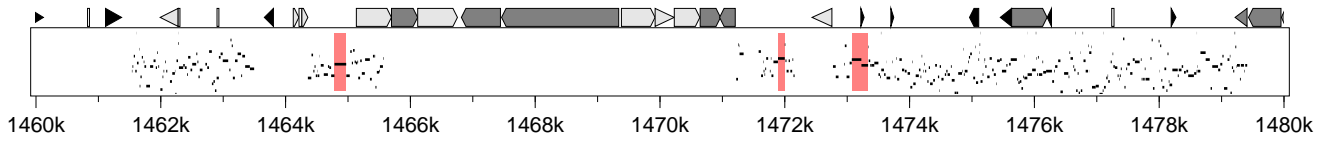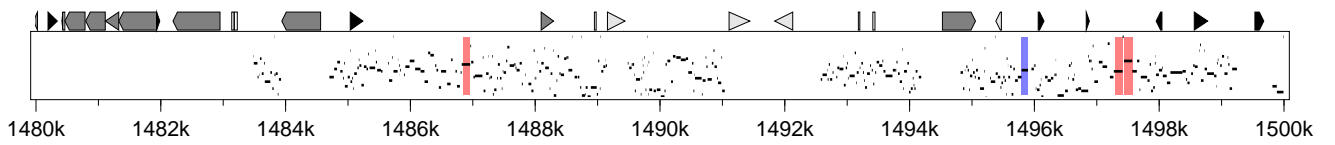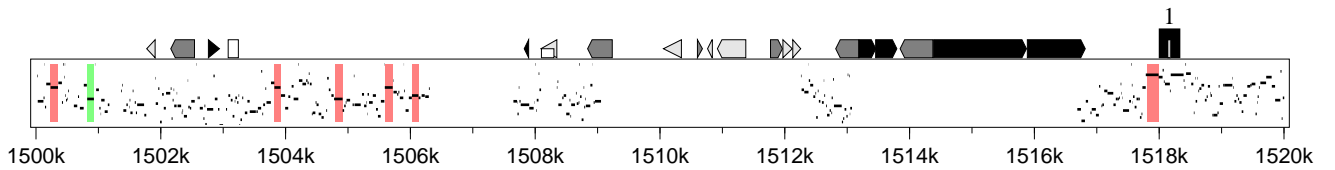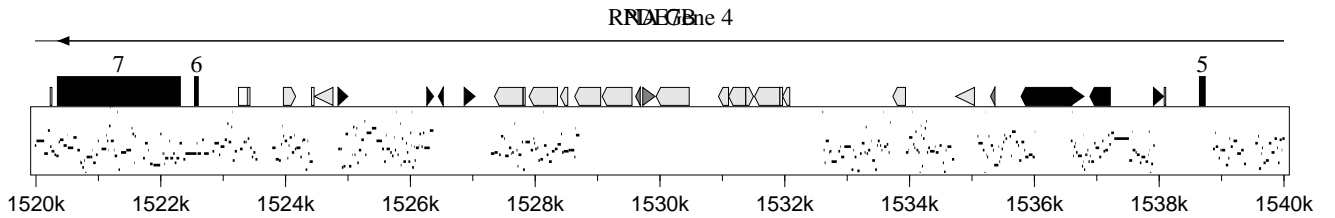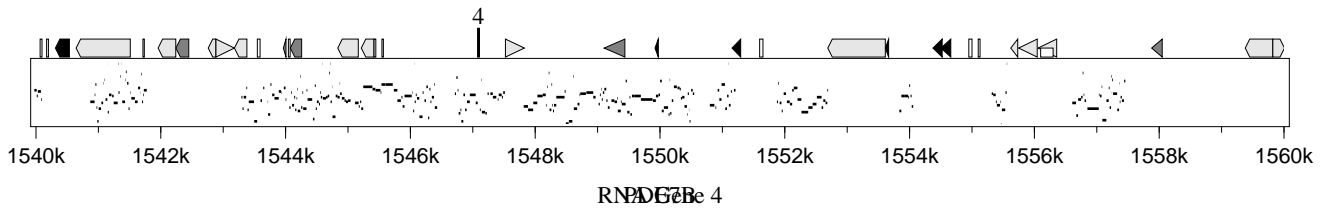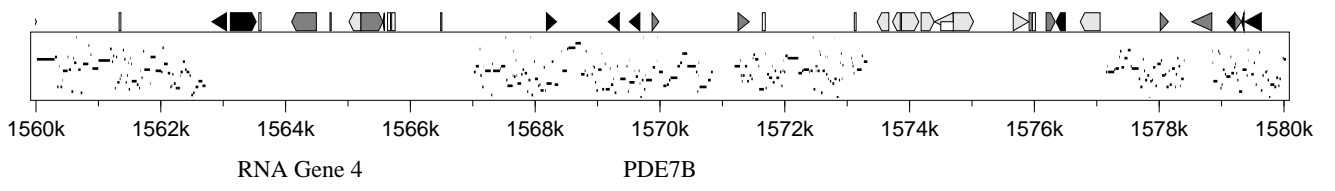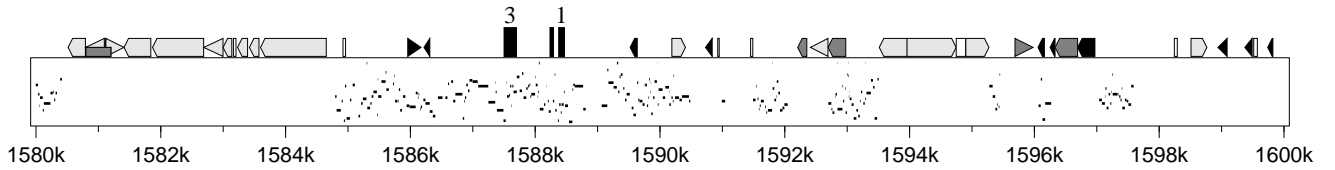

PDE7B

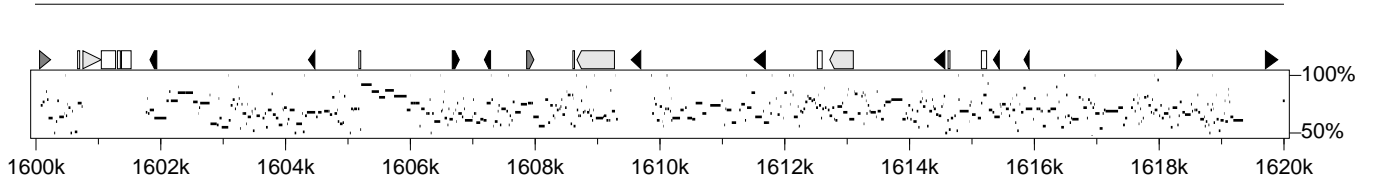

PDE7B

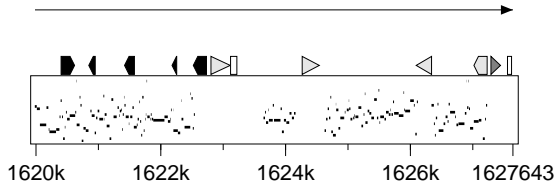

|                     |                                                                                   |
|---------------------|-----------------------------------------------------------------------------------|
| Gene                |  |
| Exon                |  |
| UTR                 |  |
| RNA                 |  |
| Simple              |  |
| MIR                 |  |
| Other SINE          |  |
| LINE1               |  |
| LINE2               |  |
| LTR                 |  |
| Other repeat        |  |
| CpG/GpC $\geq$ 0.60 |  |
| CpG/GpC $\geq$ 0.75 |  |

6q23\_candidate\_interval\_

Tue Apr 6 12:08:56 EDT 2004

<http://bio.cse.psu.edu/pipmaker/>

Genome Research, Vol. 10, Issue 4, pp577-586, April 2000.
